# Supplementary material for: Turn-On Fluorescent Chemosensor for Hg2+ Based on Multivalent Rhodamine Ligands
Source: Int J Mol Sci. 2012 Dec 7;13(12):16822–32. doi: 10.3390/ijms131216822 (PMC3546724; doi:10.3390/ijms131216822)

## Supplementary Information

**Figure S1.** Job's plot determination of (a) 1-Hg<sup>2+</sup>, 1-Fe<sup>3+</sup>, and (b) 2-Hg<sup>2+</sup>, 2-Fe<sup>3+</sup>. The total concentration of chemosensors and metal ions was kept at 0.1 mM.

(a)

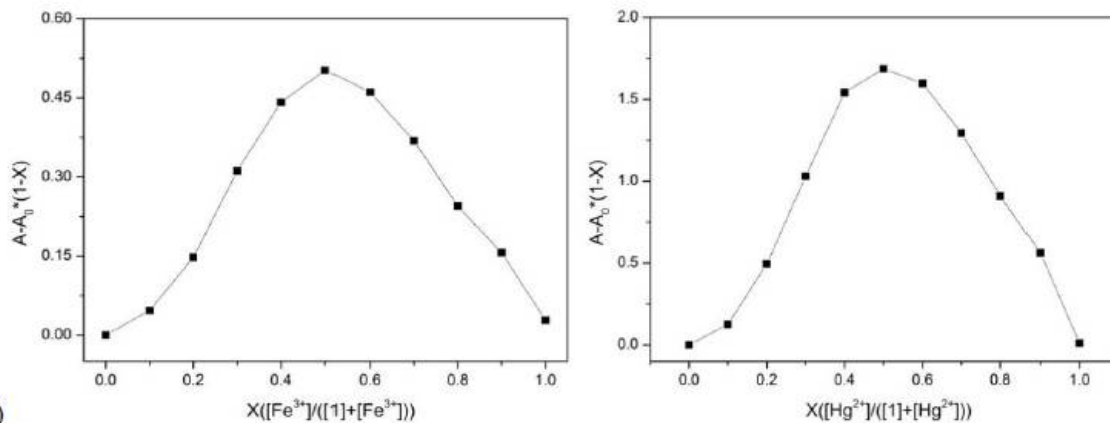

(b)

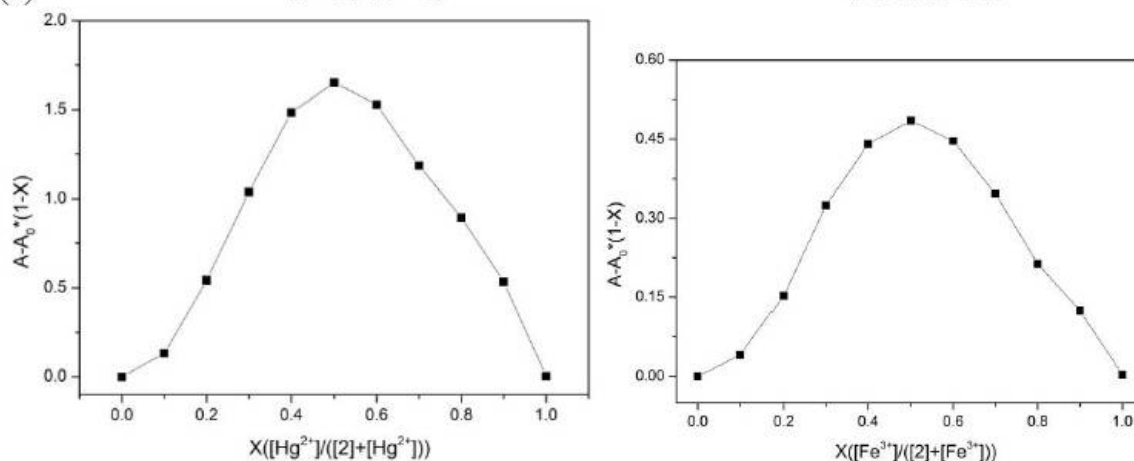

Supplement: Supplementary file 1 [file ijms-13-16822-s001.pdf]
